# Supplementary material for: The Influence Mechanism of Knowledge Heterogeneity of Venture Capital Syndication on Innovation Performance of Entrepreneurial Firms: Evidence from China
Source: Hindawi journal article supplement (doi:10.1155/2022/8130688), 2022-01-01
Supplement: f1 [file 8130688.f1.pdf]

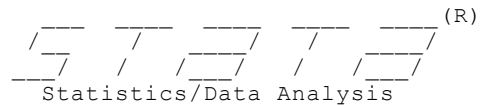

User: 11  
 Project: 11  
 VAIC | 398 105.9418 568.3064 6.144094 6715.26  
 name: <unnamed>  
 log: C:\Users\Administrator\Desktop\complexity.smcl  
 log type: smcl  
 opened on: 17 Mar 2022, 14:06:03

```
1 .
2 . *Descriptive analysis of independent and dependent variables in table 2
3 .
4 . sum patapply RDI KHS MKH IKH TKH VAIC ES
```

| Variable | Obs | Mean     | Std. Dev. | Min      | Max      |
|----------|-----|----------|-----------|----------|----------|
| patapply | 398 | 50.05276 | 85.06518  | 0        | 640      |
| RDI      | 397 | 4.51e+07 | 7.98e+07  | 0        | 1.05e+09 |
| KHS      | 398 | .651631  | .4445063  | 0        | 1.865868 |
| MKH      | 398 | 1.11254  | .5233543  | 0        | 2.23607  |
| IKH      | 398 | .3523641 | .3221617  | 0        | 1.19629  |
| TKH      | 398 | .6121237 | .7637336  | 0        | 2.23607  |
| VAIC     | 398 | 105.9418 | 568.3064  | 6.144094 | 6715.26  |
| ES       | 349 | .5219586 | .3209948  | 0        | 1.371097 |

```
5 .
6 . *Descriptive analysis of controlling variables in Table 4.
7 .
8 . sum lnasset roa tobinsq indepnum synnum grants stage ownnum mancost
```

| Variable | Obs | Mean     | Std. Dev. | Min       | Max      |
|----------|-----|----------|-----------|-----------|----------|
| lnasset  | 398 | 9.023316 | .266005   | 8.464825  | 10.46091 |
| roa      | 398 | .0609009 | .0313238  | -.0064585 | .1873702 |
| tobinsq  | 398 | 1.886399 | .7913543  | 1.053855  | 8.069163 |
| indepnum | 398 | .3652384 | .0463762  | .2        | .6       |
| synnum   | 398 | 2.484925 | .750163   | 2         | 6        |
| grants   | 398 | 12.89447 | 30.23508  | 0         | 373      |
| stage    | 398 | 3.281407 | .6963062  | 1         | 4        |
| ownnum   | 397 | 30.92871 | 53.60161  | 0         | 583.6974 |
| mancost  | 398 | 48.31219 | 43.29681  | 4.633732  | 374.2159 |

```
9 .
10 . *Relationship of KHS, IC and IP of entrepreneurial firms in Table 5.
```

```
11 .
12 . poisson patapply KHS lnasset roa tobinsq indepnum synnum grants stage ownnum mancost i.provin
```

Iteration 0: log likelihood = -14886.616  
 Iteration 1: log likelihood = -13661.945  
 Iteration 2: log likelihood = -13630.94  
 Iteration 3: log likelihood = -13630.889  
 Iteration 4: log likelihood = -13630.889

Poisson regression Number of obs = 397  
 LR chi2(37) = 7930.33  
 Prob > chi2 = 0.0000  
 Pseudo R2 = 0.2253  
 Log likelihood = -13630.889

| patapply | Coef.     | Std. Err. | z      | P> z  | [95% Conf. Interval] |           |
|----------|-----------|-----------|--------|-------|----------------------|-----------|
| KHS      | .0522527  | .0171106  | 3.05   | 0.002 | .0187167             | .0857888  |
| lnasset  | .4735214  | .0339674  | 13.94  | 0.000 | .4069465             | .5400963  |
| roa      | -.8374517 | .2663823  | -3.14  | 0.002 | -1.359551            | -.315352  |
| tobinsq  | .0490314  | .0144987  | 3.38   | 0.001 | .0206145             | .0774484  |
| indepnum | -1.901439 | .17854    | -10.65 | 0.000 | -2.25137             | -1.551507 |
| synnum   | .0492286  | .0099911  | 4.93   | 0.000 | .0296463             | .0688109  |
| grants   | .0002349  | .0002396  | 0.98   | 0.327 | -.0002347            | .0007045  |
| stage    | .0670505  | .0116277  | 5.77   | 0.000 | .0442607             | .0898402  |
| ownnum   | .0034211  | .0000921  | 37.13  | 0.000 | .0032405             | .0036017  |

|                       |           |          |        |       |           |           |
|-----------------------|-----------|----------|--------|-------|-----------|-----------|
| mancost               | .0045575  | .0001278 | 35.65  | 0.000 | .0043069  | .004808   |
| provincefixedeffects  |           |          |        |       |           |           |
| 2                     | .2694634  | .0211646 | 12.73  | 0.000 | .2279814  | .3109453  |
| 3                     | .2257464  | .0255484 | 8.84   | 0.000 | .1756724  | .2758203  |
| 4                     | .2753441  | .0209957 | 13.11  | 0.000 | .2341932  | .3164949  |
| industryfixedeffects1 |           |          |        |       |           |           |
| B                     | -1.487619 | .0709865 | -20.96 | 0.000 | -1.62675  | -1.348488 |
| C                     | -1.326489 | .0394316 | -33.64 | 0.000 | -1.403773 | -1.249204 |
| D                     | .1246123  | .0600853 | 2.07   | 0.038 | .0068472  | .2423774  |
| E                     | -2.014502 | .0835606 | -24.11 | 0.000 | -2.178278 | -1.850726 |
| F                     | -1.793248 | .1294748 | -13.85 | 0.000 | -2.047014 | -1.539482 |
| G                     | -2.387419 | .336969  | -7.08  | 0.000 | -3.047866 | -1.726971 |
| I                     | -1.093765 | .0431917 | -25.32 | 0.000 | -1.178419 | -1.009111 |
| L                     | -1.491611 | .0766484 | -19.46 | 0.000 | -1.641839 | -1.341383 |
| M                     | -1.383776 | .0677996 | -20.41 | 0.000 | -1.516661 | -1.250892 |
| N                     | -.5944893 | .0674041 | -8.82  | 0.000 | -.7265989 | -.4623796 |
| P                     | -3.47319  | .4110968 | -8.45  | 0.000 | -4.278925 | -2.667455 |
| Q                     | -1.879734 | .1833857 | -10.25 | 0.000 | -2.239163 | -1.520305 |
| R                     | -3.083741 | .1245387 | -24.76 | 0.000 | -3.327832 | -2.83965  |
| listdt                |           |          |        |       |           |           |
| 2006                  | 1.357381  | .2805574 | 4.84   | 0.000 | .8074985  | 1.907263  |
| 2007                  | 2.0432    | .2630259 | 7.77   | 0.000 | 1.527679  | 2.558722  |
| 2008                  | 1.129477  | .2837245 | 3.98   | 0.000 | .5733874  | 1.685567  |
| 2009                  | 1.29075   | .2636441 | 4.90   | 0.000 | .7740172  | 1.807483  |
| 2010                  | 1.302208  | .2613907 | 4.98   | 0.000 | .789892   | 1.814525  |
| 2011                  | 1.728339  | .2607475 | 6.63   | 0.000 | 1.217284  | 2.239395  |
| 2012                  | 1.770335  | .2606429 | 6.79   | 0.000 | 1.259485  | 2.281186  |
| 2014                  | 1.754619  | .2618353 | 6.70   | 0.000 | 1.241431  | 2.267807  |
| 2015                  | 1.255843  | .2620248 | 4.79   | 0.000 | .7422838  | 1.769402  |
| 2016                  | 1.308916  | .2615562 | 5.00   | 0.000 | .7962757  | 1.821557  |
| 2017                  | 1.478781  | .2608231 | 5.67   | 0.000 | .9675773  | 1.989985  |
| _cons                 | -.9360213 | .4033619 | -2.32  | 0.020 | -1.726596 | -.1454465 |

13 .

14 . poisson patapply MKH lnasset roa tobinsq indepnum synnum grants stage ownnum mancost i.provin

Iteration 0: log likelihood = -14888.399  
 Iteration 1: log likelihood = -13664.904  
 Iteration 2: log likelihood = -13633.724  
 Iteration 3: log likelihood = -13633.671  
 Iteration 4: log likelihood = -13633.671

Poisson regression  
 Number of obs = 397  
 LR chi2(37) = 7924.76  
 Prob > chi2 = 0.0000  
 Pseudo R2 = 0.2252  
 Log likelihood = -13633.671

| patapply              | Coef.     | Std. Err. | z      | P> z  | [95% Conf. Interval] |
|-----------------------|-----------|-----------|--------|-------|----------------------|
| MKH                   | .0272935  | .0141575  | 1.93   | 0.054 | -.0004546 .0550416   |
| lnasset               | .4783359  | .0338772  | 14.12  | 0.000 | .4119378 .5447341    |
| roa                   | -.8398047 | .2680964  | -3.13  | 0.002 | -1.365264 -.3143454  |
| tobinsq               | .050869   | .0144677  | 3.52   | 0.000 | .0225128 .0792252    |
| indepnum              | -1.876588 | .1782272  | -10.53 | 0.000 | -2.225907 -1.52727   |
| synnum                | .0470299  | .0099456  | 4.73   | 0.000 | .027537 .0665229     |
| grants                | .0002289  | .0002404  | 0.95   | 0.341 | -.0002424 .0007001   |
| stage                 | .0657441  | .0116217  | 5.66   | 0.000 | .0429659 .0885223    |
| ownnum                | .0033861  | .0000923  | 36.68  | 0.000 | .0032052 .003567     |
| mancost               | .0045563  | .0001288  | 35.38  | 0.000 | .0043039 .0048087    |
| provincefixedeffects  |           |           |        |       |                      |
| 2                     | .2686448  | .0211789  | 12.68  | 0.000 | .2271348 .3101547    |
| 3                     | .2324133  | .0257425  | 9.03   | 0.000 | .181959 .2828676     |
| 4                     | .2744398  | .0210019  | 13.07  | 0.000 | .2332769 .3156028    |
| industryfixedeffects1 |           |           |        |       |                      |









23 .

24 . poisson patapply KHS VAIC lnasset roa tobinsq indepnum synnum grants stage ownnum mancost i.p

```
Iteration 0: log likelihood = -14882.899
Iteration 1: log likelihood = -13657.014
Iteration 2: log likelihood = -13626.162
Iteration 3: log likelihood = -13626.112
Iteration 4: log likelihood = -13626.112
```

```
Poisson regression      Number of obs      =           397
                        LR chi2(38)                   =          7939.88
                        Prob > chi2                    =           0.0000
                        Pseudo R2                      =           0.2256

Log likelihood = -13626.112
```

|                       | Coef.     | Std. Err. | z      | P> z  | [95% Conf. Interval] |           |
|-----------------------|-----------|-----------|--------|-------|----------------------|-----------|
| patapply              |           |           |        |       |                      |           |
| KHS                   | .051979   | .0171213  | 3.04   | 0.002 | .0184218             | .0855362  |
| VAIC                  | .0000368  | .0000116  | 3.17   | 0.002 | .0000141             | .0000595  |
| lnasset               | .4678081  | .0340013  | 13.76  | 0.000 | .4011668             | .5344494  |
| roa                   | -.8457387 | .2667331  | -3.17  | 0.002 | -1.368526            | -.3229515 |
| tobinsq               | .0493778  | .0144902  | 3.41   | 0.001 | .0209776             | .077778   |
| indepnum              | -1.931683 | .1784608  | -10.82 | 0.000 | -2.28146             | -1.581906 |
| synnum                | .0484987  | .0099888  | 4.86   | 0.000 | .0289209             | .0680765  |
| grants                | .0002448  | .0002397  | 1.02   | 0.307 | -.0002249            | .0007146  |
| stage                 | .066113   | .0116265  | 5.69   | 0.000 | .0433254             | .0889006  |
| ownnum                | .0034138  | .0000922  | 37.04  | 0.000 | .0032331             | .0035944  |
| mancost               | .0045636  | .0001278  | 35.72  | 0.000 | .0043132             | .004814   |
| provincefixedeffects  |           |           |        |       |                      |           |
| 2                     | .2682732  | .0211766  | 12.67  | 0.000 | .2267678             | .3097786  |
| 3                     | .2147143  | .0257867  | 8.33   | 0.000 | .1641732             | .2652553  |
| 4                     | .2728848  | .0210082  | 12.99  | 0.000 | .2317095             | .3140601  |
| industryfixedeffects1 |           |           |        |       |                      |           |
| B                     | -1.478191 | .0710334  | -20.81 | 0.000 | -1.617414            | -1.338968 |
| C                     | -1.330041 | .0394501  | -33.71 | 0.000 | -1.407361            | -1.25272  |
| D                     | .1332507  | .0601002  | 2.22   | 0.027 | .0154565             | .251045   |
| E                     | -2.011294 | .0835506  | -24.07 | 0.000 | -2.17505             | -1.847538 |
| F                     | -1.793216 | .1294818  | -13.85 | 0.000 | -2.046996            | -1.539436 |
| G                     | -2.390729 | .3369699  | -7.09  | 0.000 | -3.051177            | -1.73028  |
| I                     | -1.090884 | .0431872  | -25.26 | 0.000 | -1.175529            | -1.006238 |
| L                     | -1.47911  | .0767366  | -19.28 | 0.000 | -1.629511            | -1.328709 |
| M                     | -1.38424  | .0677971  | -20.42 | 0.000 | -1.51712             | -1.25136  |
| N                     | -.5932336 | .0673904  | -8.80  | 0.000 | -.7253163            | -.4611508 |
| P                     | -3.469005 | .4111028  | -8.44  | 0.000 | -4.274751            | -2.663258 |
| Q                     | -1.879761 | .1833885  | -10.25 | 0.000 | -2.239196            | -1.520326 |
| R                     | -3.081392 | .1245397  | -24.74 | 0.000 | -3.325485            | -2.837298 |
| listdt                |           |           |        |       |                      |           |
| 2006                  | 1.367113  | .2805881  | 4.87   | 0.000 | .8171704             | 1.917056  |
| 2007                  | 2.029279  | .2630685  | 7.71   | 0.000 | 1.513674             | 2.544884  |
| 2008                  | 1.13334   | .2837406  | 3.99   | 0.000 | .5772185             | 1.689461  |
| 2009                  | 1.295837  | .2636672  | 4.91   | 0.000 | .7790586             | 1.812615  |
| 2010                  | 1.311388  | .2614248  | 5.02   | 0.000 | .7990046             | 1.823771  |
| 2011                  | 1.730702  | .260765   | 6.64   | 0.000 | 1.219612             | 2.241792  |
| 2012                  | 1.770229  | .2606627  | 6.79   | 0.000 | 1.259339             | 2.281118  |
| 2014                  | 1.762786  | .2618647  | 6.73   | 0.000 | 1.249541             | 2.276032  |
| 2015                  | 1.259652  | .2620435  | 4.81   | 0.000 | .7460563             | 1.773248  |
| 2016                  | 1.316638  | .2615845  | 5.03   | 0.000 | .8039416             | 1.829334  |
| 2017                  | 1.485844  | .2608519  | 5.70   | 0.000 | .974584              | 1.997105  |
| _cons                 | -.8735289 | .4038484  | -2.16  | 0.031 | -1.665057            | -.0820006 |

25 .  
 26 . \*Moderating Effect of equity structure in Table 6.  
 27 .  
 28 . poisson patapply KHS KHES ES lnasset roa tobinsq indepnum synnum grants stage ownnum mancost

Iteration 0: log likelihood = -12774.815  
 Iteration 1: log likelihood = -11890.469  
 Iteration 2: log likelihood = -11866.782  
 Iteration 3: log likelihood = -11866.732  
 Iteration 4: log likelihood = -11866.732

Poisson regression  
 Number of obs = 348  
 LR chi2(39) = 6818.00  
 Prob > chi2 = 0.0000  
 Pseudo R2 = 0.2232  
 Log likelihood = -11866.732

| patapply              | Coef.     | Std. Err. | z      | P> z  | [95% Conf. Interval] |           |
|-----------------------|-----------|-----------|--------|-------|----------------------|-----------|
| KHS                   | -.1181118 | .0376212  | -3.14  | 0.002 | -.1918479            | -.0443756 |
| KHES                  | .4307942  | .0596128  | 7.23   | 0.000 | .3139553             | .5476331  |
| ES                    | -.6036673 | .0478464  | -12.62 | 0.000 | -.6974446            | -.50989   |
| lnasset               | .5992876  | .0369318  | 16.23  | 0.000 | .5269026             | .6716726  |
| roa                   | .3574057  | .2930464  | 1.22   | 0.223 | -.2169548            | .9317661  |
| tobinsq               | .0112061  | .0171991  | 0.65   | 0.515 | -.0225036            | .0449157  |
| indepnum              | -2.425482 | .1881996  | -12.89 | 0.000 | -2.794346            | -2.056617 |
| synnum                | .0535091  | .0105817  | 5.06   | 0.000 | .0327695             | .0742488  |
| grants                | .0009038  | .0002335  | 3.87   | 0.000 | .0004461             | .0013615  |
| stage                 | .0623509  | .0128148  | 4.87   | 0.000 | .0372343             | .0874676  |
| ownnum                | .0035702  | .0001045  | 34.17  | 0.000 | .0033654             | .003775   |
| mancost               | .0049227  | .0001503  | 32.74  | 0.000 | .004628              | .0052173  |
| provincefixedeffects  |           |           |        |       |                      |           |
| 2                     | .1544736  | .022217   | 6.95   | 0.000 | .110929              | .1980182  |
| 3                     | .1634345  | .0276614  | 5.91   | 0.000 | .1092191             | .2176498  |
| 4                     | .2604864  | .0221057  | 11.78  | 0.000 | .21716               | .3038127  |
| industryfixedeffects1 |           |           |        |       |                      |           |
| B                     | -1.562502 | .0719585  | -21.71 | 0.000 | -1.703538            | -1.421466 |
| C                     | -1.31439  | .0404663  | -32.48 | 0.000 | -1.393702            | -1.235077 |
| D                     | -1.112428 | .1187549  | -9.37  | 0.000 | -1.345184            | -.8796729 |
| E                     | -2.237226 | .0926358  | -24.15 | 0.000 | -2.418789            | -2.055663 |
| F                     | -1.858915 | .1303433  | -14.26 | 0.000 | -2.114383            | -1.603447 |
| G                     | -2.585585 | .337206   | -7.67  | 0.000 | -3.246496            | -1.924673 |
| I                     | -1.076688 | .0448098  | -24.03 | 0.000 | -1.164514            | -.9888624 |
| L                     | -1.706374 | .0782334  | -21.81 | 0.000 | -1.859709            | -1.55304  |
| M                     | -1.430968 | .0685276  | -20.88 | 0.000 | -1.56528             | -1.296657 |
| N                     | -.6592764 | .0694148  | -9.50  | 0.000 | -.7953269            | -.523226  |
| P                     | -3.484478 | .4113173  | -8.47  | 0.000 | -4.290645            | -2.678311 |
| Q                     | -1.864414 | .1841029  | -10.13 | 0.000 | -2.225249            | -1.503579 |
| R                     | -3.373993 | .1501831  | -22.47 | 0.000 | -3.668346            | -3.079639 |
| listdt                |           |           |        |       |                      |           |
| 2006                  | .754169   | .2901604  | 2.60   | 0.009 | .1854651             | 1.322873  |
| 2007                  | 1.70649   | .2732788  | 6.24   | 0.000 | 1.170873             | 2.242107  |
| 2008                  | .7796774  | .3280495  | 2.38   | 0.017 | .1367121             | 1.422643  |
| 2009                  | .6006105  | .2753411  | 2.18   | 0.029 | .0609518             | 1.140269  |
| 2010                  | .8686172  | .2720135  | 3.19   | 0.001 | .3354806             | 1.401754  |
| 2011                  | 1.164922  | .2715219  | 4.29   | 0.000 | .6327489             | 1.697095  |
| 2012                  | 1.17663   | .2716747  | 4.33   | 0.000 | .644157              | 1.709102  |
| 2014                  | 1.104316  | .2729745  | 4.05   | 0.000 | .5692962             | 1.639337  |
| 2015                  | .6743549  | .2733172  | 2.47   | 0.014 | .138663              | 1.210047  |
| 2016                  | .8995437  | .2725169  | 3.30   | 0.001 | .3654203             | 1.433667  |
| 2017                  | .9710673  | .2717591  | 3.57   | 0.000 | .4384293             | 1.503705  |
| _cons                 | -1.047551 | .4345393  | -2.41  | 0.016 | -1.899232            | -.1958695 |









35 .

36 . poisson VAIC KHS KHES ES lnasset roa tobinsq indepnum synnum grants stage ownnum mancost i.pr  
 note: you are responsible for interpretation of noncount dep. variable

Iteration 0: log likelihood = -76871.18  
 Iteration 1: log likelihood = -44583.627  
 Iteration 2: log likelihood = -33953.023  
 Iteration 3: log likelihood = -32228.943  
 Iteration 4: log likelihood = -32208.034  
 Iteration 5: log likelihood = -32208.021  
 Iteration 6: log likelihood = -32208.021

Poisson regression  
 Number of obs = 348  
 LR chi2(39) = 72606.47  
 Prob > chi2 = 0.0000  
 Pseudo R2 = 0.5299  
 Log likelihood = -32208.021

| VAIC                  | Coef.     | Std. Err. | z      | P> z  | [95% Conf. Interval] |           |
|-----------------------|-----------|-----------|--------|-------|----------------------|-----------|
| KHS                   | .4860409  | .027647   | 17.58  | 0.000 | .4318539             | .5402279  |
| KHES                  | -1.492352 | .0441915  | -33.77 | 0.000 | -1.578966            | -1.405738 |
| ES                    | .9646567  | .0321877  | 29.97  | 0.000 | .90157               | 1.027743  |
| lnasset               | 1.488376  | .0301691  | 49.33  | 0.000 | 1.429246             | 1.547506  |
| roa                   | 4.106376  | .2571602  | 15.97  | 0.000 | 3.602352             | 4.610401  |
| tobinsq               | .2962305  | .0145374  | 20.38  | 0.000 | .2677377             | .3247233  |
| indepnum              | 1.635391  | .1110673  | 14.72  | 0.000 | 1.417703             | 1.853079  |
| synnum                | -.0307645 | .0083746  | -3.67  | 0.000 | -.0471785            | -.0143505 |
| grants                | .0033598  | .0002012  | 16.70  | 0.000 | .0029655             | .0037542  |
| stage                 | .741952   | .0109323  | 67.87  | 0.000 | .7205251             | .7633789  |
| ownnum                | .0032417  | .0001572  | 20.62  | 0.000 | .0029337             | .0035498  |
| mancost               | -.0094381 | .0002433  | -38.79 | 0.000 | -.009915             | -.0089612 |
| provincefixedeffects  |           |           |        |       |                      |           |
| 2                     | .3168262  | .0210894  | 15.02  | 0.000 | .2754917             | .3581608  |
| 3                     | 2.686748  | .0221372  | 121.37 | 0.000 | 2.64336              | 2.730136  |
| 4                     | .7482719  | .0199792  | 37.45  | 0.000 | .7091135             | .7874304  |
| industryfixedeffects1 |           |           |        |       |                      |           |
| B                     | -3.130596 | .0962159  | -32.54 | 0.000 | -3.319175            | -2.942016 |
| C                     | .2134874  | .0700982  | 3.05   | 0.002 | .0760974             | .3508774  |
| D                     | -1.484082 | .132279   | -11.22 | 0.000 | -1.743344            | -1.224819 |
| E                     | -.8885632 | .0866524  | -10.25 | 0.000 | -1.058399            | -.7187276 |
| F                     | -.6093169 | .1300788  | -4.68  | 0.000 | -.8642667            | -.3543672 |
| G                     | .6982475  | .2234517  | 3.12   | 0.002 | .2602901             | 1.136205  |
| I                     | -1.86611  | .0736992  | -25.32 | 0.000 | -2.010558            | -1.721663 |
| L                     | -2.93341  | .1093895  | -26.82 | 0.000 | -3.14781             | -2.719011 |
| M                     | -.7712203 | .1007369  | -7.66  | 0.000 | -.9686611            | -.5737795 |
| N                     | -1.060483 | .1223619  | -8.67  | 0.000 | -1.300308            | -.8206583 |
| P                     | -1.383243 | .1550484  | -8.92  | 0.000 | -1.687132            | -1.079353 |
| Q                     | -1.259884 | .2582775  | -4.88  | 0.000 | -1.766099            | -.7536696 |
| R                     | -.596803  | .0963687  | -6.19  | 0.000 | -.7856821            | -.4079239 |
| listdt                |           |           |        |       |                      |           |
| 2006                  | -3.341025 | .1455509  | -22.95 | 0.000 | -3.6263              | -3.05575  |
| 2007                  | .6910585  | .087597   | 7.89   | 0.000 | .5193715             | .8627455  |
| 2008                  | -1.444013 | .1402025  | -10.30 | 0.000 | -1.718805            | -1.169221 |
| 2009                  | -2.184933 | .0924615  | -23.63 | 0.000 | -2.366154            | -2.003712 |
| 2010                  | -3.421673 | .0890673  | -38.42 | 0.000 | -3.596242            | -3.247104 |
| 2011                  | -1.305925 | .0859583  | -15.19 | 0.000 | -1.474401            | -1.13745  |
| 2012                  | -1.537348 | .0874794  | -17.57 | 0.000 | -1.708804            | -1.365891 |
| 2014                  | -4.289575 | .1009803  | -42.48 | 0.000 | -4.487493            | -4.091657 |
| 2015                  | -4.008439 | .0933179  | -42.95 | 0.000 | -4.191339            | -3.825539 |
| 2016                  | -3.957949 | .0922567  | -42.90 | 0.000 | -4.138769            | -3.777129 |
| 2017                  | -3.183019 | .0881101  | -36.13 | 0.000 | -3.355711            | -3.010326 |
| _cons                 | -11.27281 | .2989407  | -37.71 | 0.000 | -11.85873            | -10.6869  |





43 .

44 . poisson RDI KHS VAIC lnasset roa tobinsq indepnum synnum grants stage ownnum mancost i.provin  
 note: you are responsible for interpretation of noncount dep. variable

Iteration 0: log likelihood = **-9.625e+09**  
 Iteration 1: log likelihood = **-7.142e+09**  
 Iteration 2: log likelihood = **-7.115e+09**  
 Iteration 3: log likelihood = **-7.115e+09**  
 Iteration 4: log likelihood = **-7.115e+09**

Poisson regression Number of obs = **396**  
 LR chi2(38) = **9.49e+09**  
 Prob > chi2 = **0.0000**  
 Pseudo R2 = **0.4000**  
 Log likelihood = **-7.115e+09**

| RDI                   | Coef.     | Std. Err. | z        | P> z  | [95% Conf. Interval] |           |
|-----------------------|-----------|-----------|----------|-------|----------------------|-----------|
| KHS                   | .1227801  | .0000182  | 6739.20  | 0.000 | .1227444             | .1228158  |
| VAIC                  | .0001177  | 1.06e-08  | 1.1e+04  | 0.000 | .0001177             | .0001177  |
| lnasset               | -.0143659 | .0000356  | -403.35  | 0.000 | -.0144357            | -.014296  |
| roa                   | -1.040615 | .0002958  | -3517.41 | 0.000 | -1.041195            | -1.040035 |
| tobinsq               | .0873634  | .0000138  | 6312.87  | 0.000 | .0873363             | .0873905  |
| indepnum              | -2.303998 | .0001889  | -1.2e+04 | 0.000 | -2.304368            | -2.303628 |
| synnum                | -.002935  | .0000111  | -265.10  | 0.000 | -.0029567            | -.0029133 |
| grants                | -.0015211 | 3.34e-07  | -4547.92 | 0.000 | -.0015217            | -.0015204 |
| stage                 | .2910234  | .0000134  | 2.2e+04  | 0.000 | .2909972             | .2910496  |
| ownnum                | -.0007635 | 1.32e-07  | -5776.35 | 0.000 | -.0007637            | -.0007632 |
| mancost               | .0072279  | 1.18e-07  | 6.1e+04  | 0.000 | .0072277             | .0072281  |
| provincefixedeffects  |           |           |          |       |                      |           |
| 2                     | .0227537  | .0000218  | 1042.14  | 0.000 | .0227109             | .0227965  |
| 3                     | .0867019  | .000027   | 3205.85  | 0.000 | .0866489             | .0867549  |
| 4                     | .0049425  | .0000214  | 230.53   | 0.000 | .0049005             | .0049845  |
| industryfixedeffects1 |           |           |          |       |                      |           |
| B                     | .0005555  | .0001057  | 5.25     | 0.000 | .0003483             | .0007628  |
| C                     | .2353001  | .0000762  | 3089.48  | 0.000 | .2351508             | .2354493  |
| D                     | .6463961  | .0001126  | 5742.17  | 0.000 | .6461755             | .6466167  |
| E                     | 1.501392  | .0000809  | 1.9e+04  | 0.000 | 1.501233             | 1.50155   |
| F                     | -.1626371 | .0001254  | -1296.76 | 0.000 | -.162883             | -.1623913 |
| G                     | -.1754469 | .0002604  | -673.79  | 0.000 | -.1759573            | -.1749366 |
| I                     | .1531649  | .0000784  | 1953.88  | 0.000 | .1530112             | .1533185  |
| L                     | -.3870522 | .0001112  | -3479.46 | 0.000 | -.3872702            | -.3868342 |
| M                     | .1272762  | .0000996  | 1277.36  | 0.000 | .1270809             | .1274715  |
| N                     | .1693547  | .0001214  | 1395.43  | 0.000 | .1691169             | .1695926  |
| P                     | -.3291405 | .0002487  | -1323.36 | 0.000 | -.329628             | -.328653  |
| Q                     | 1.047165  | .000147   | 7121.83  | 0.000 | 1.046876             | 1.047453  |
| R                     | .0687038  | .0001102  | 623.55   | 0.000 | .0684878             | .0689197  |
| listdt                |           |           |          |       |                      |           |
| 2006                  | -.5533249 | .0001637  | -3380.74 | 0.000 | -.5536457            | -.5530041 |
| 2007                  | .7217891  | .0001004  | 7187.92  | 0.000 | .7215922             | .7219859  |
| 2008                  | -.6401534 | .0001367  | -4681.36 | 0.000 | -.6404215            | -.6398854 |
| 2009                  | .3026576  | .0001014  | 2983.70  | 0.000 | .3024588             | .3028564  |
| 2010                  | -.4599362 | .0000994  | -4626.95 | 0.000 | -.460131             | -.4597413 |
| 2011                  | -.7026661 | .000099   | -7096.41 | 0.000 | -.7028601            | -.702472  |
| 2012                  | -.5811303 | .0000989  | -5876.93 | 0.000 | -.5813241            | -.5809365 |
| 2014                  | -.4120821 | .0001004  | -4104.85 | 0.000 | -.4122788            | -.4118853 |
| 2015                  | -.4627907 | .0001004  | -4608.16 | 0.000 | -.4629875            | -.4625939 |
| 2016                  | -.5740825 | .0000995  | -5767.40 | 0.000 | -.5742776            | -.5738874 |
| 2017                  | -.6677473 | .0000979  | -6818.03 | 0.000 | -.6679393            | -.6675553 |
| _cons                 | 17.20609  | .0003444  | 5.0e+04  | 0.000 | 17.20542             | 17.20677  |

```

45 .
46 . g dKHS =( KHS >0.4438863 )
47 .
48 . probit dKHS lnasset debt roa lfirmage grants i.provincefixedeffects i.industryfixedeffects1 i

```

note: 7.industryfixedeffects1 != 0 predicts failure perfectly  
7.industryfixedeffects1 dropped and 1 obs not used

note: 12.industryfixedeffects1 != 0 predicts success perfectly  
12.industryfixedeffects1 dropped and 1 obs not used

note: 13.industryfixedeffects1 != 0 predicts failure perfectly  
13.industryfixedeffects1 dropped and 1 obs not used

note: 2008.listdt != 0 predicts success perfectly  
2008.listdt dropped and 3 obs not used

```

Iteration 0: log likelihood = -271.70859
Iteration 1: log likelihood = -262.31549
Iteration 2: log likelihood = -262.26537
Iteration 3: log likelihood = -262.26537

```

```

Probit regression                               Number of obs   =           392
                                                LR chi2(28)     =           18.89
                                                Prob > chi2     =           0.9016
Log likelihood = -262.26537                    Pseudo R2      =           0.0348

```

| dKHS                  | Coef.     | Std. Err. | z     | P> z  | [95% Conf. Interval] |          |
|-----------------------|-----------|-----------|-------|-------|----------------------|----------|
| lnasset               | .2454827  | .2997643  | 0.82  | 0.413 | -.3420447            | .83301   |
| debt                  | -.3617998 | .5809905  | -0.62 | 0.533 | -1.50052             | .7769208 |
| roa                   | -1.526889 | 2.501697  | -0.61 | 0.542 | -6.430125            | 3.376347 |
| lfirmage              | -.1238256 | .3815017  | -0.32 | 0.746 | -.8715551            | .623904  |
| grants                | .0001169  | .0021955  | 0.05  | 0.958 | -.0041861            | .00442   |
| provincefixedeffects  |           |           |       |       |                      |          |
| 2                     | -.1808225 | .1795661  | -1.01 | 0.314 | -.5327655            | .1711205 |
| 3                     | -.0388817 | .2202293  | -0.18 | 0.860 | -.4705232            | .3927597 |
| 4                     | -.0546963 | .1757154  | -0.31 | 0.756 | -.3990921            | .2896995 |
| industryfixedeffects1 |           |           |       |       |                      |          |
| B                     | .2547585  | .844431   | 0.30  | 0.763 | -1.400296            | 1.909813 |
| C                     | .2094932  | .6138006  | 0.34  | 0.733 | -.9935339            | 1.41252  |
| D                     | .5198325  | .9873762  | 0.53  | 0.599 | -1.415389            | 2.455054 |
| E                     | -.1237547 | .7408311  | -0.17 | 0.867 | -1.575757            | 1.328248 |
| F                     | .5321565  | .9958898  | 0.53  | 0.593 | -1.419752            | 2.484065 |
| G                     | 0         | (empty)   |       |       |                      |          |
| I                     | .0468781  | .6366687  | 0.07  | 0.941 | -1.20097             | 1.294726 |
| L                     | .4452027  | .8410594  | 0.53  | 0.597 | -1.203243            | 2.093649 |
| M                     | -.2855379 | .764424   | -0.37 | 0.709 | -1.783781            | 1.212706 |
| N                     | .2928495  | .9082782  | 0.32  | 0.747 | -1.487343            | 2.073042 |
| P                     | 0         | (empty)   |       |       |                      |          |
| Q                     | 0         | (empty)   |       |       |                      |          |
| R                     | .2731261  | .8369373  | 0.33  | 0.744 | -1.367241            | 1.913493 |
| listdt                |           |           |       |       |                      |          |
| 2006                  | .0047176  | 1.090686  | 0.00  | 0.997 | -2.132989            | 2.142424 |
| 2007                  | .1461241  | .897926   | 0.16  | 0.871 | -1.613779            | 1.906027 |
| 2008                  | 0         | (empty)   |       |       |                      |          |
| 2009                  | -1.222901 | .8935548  | -1.37 | 0.171 | -2.974236            | .5284345 |
| 2010                  | -.6340082 | .8265893  | -0.77 | 0.443 | -2.254093            | .986077  |
| 2011                  | -.5257398 | .8320584  | -0.63 | 0.527 | -2.156544            | 1.105065 |
| 2012                  | -.4135813 | .8369339  | -0.49 | 0.621 | -2.053942            | 1.226779 |
| 2014                  | -.4978889 | .8561933  | -0.58 | 0.561 | -2.175997            | 1.180219 |
| 2015                  | -.0561824 | .8305794  | -0.07 | 0.946 | -1.684088            | 1.571723 |
| 2016                  | -.4638985 | .8347663  | -0.56 | 0.578 | -2.10001             | 1.172213 |
| 2017                  | -.2075762 | .8305893  | -0.25 | 0.803 | -1.835501            | 1.420349 |
| _cons                 | -1.623889 | 2.751178  | -0.59 | 0.555 | -7.016098            | 3.76832  |



```

49 .
50 . predict gw, xb
    (6 missing values generated)

51 .
52 . g lambda=normalden(gw,0,1)/normal(gw) if dKHS ==1
    (203 missing values generated)

53 .
54 . replace lambda=-normalden(gw,0,1)/normal(-gw) if dKHS==0
    (197 real changes made)

55 .
56 . poisson patapply KHS lambda lnasset roa tobinsq indepnum synnum grants stage ownnum mancost i

```

```

Iteration 0: log likelihood = -14729.617
Iteration 1: log likelihood = -13606.425
Iteration 2: log likelihood = -13577.874
Iteration 3: log likelihood = -13577.833
Iteration 4: log likelihood = -13577.833

```

```

Poisson regression                               Number of obs   =           391
LR chi2(34)                                    =          7806.86
Prob > chi2                                     =           0.0000
Pseudo R2                                       =           0.2233

Log likelihood = -13577.833

```

|                       | Coef.     | Std. Err. | z      | P> z  | [95% Conf. Interval] |           |
|-----------------------|-----------|-----------|--------|-------|----------------------|-----------|
| patapply              |           |           |        |       |                      |           |
| KHS                   | .2003852  | .030304   | 6.61   | 0.000 | .1409906             | .2597799  |
| lambda                | -.1008461 | .0168365  | -5.99  | 0.000 | -.133845             | -.0678473 |
| lnasset               | .4670213  | .0340975  | 13.70  | 0.000 | .4001914             | .5338513  |
| roa                   | -.7491392 | .2680638  | -2.79  | 0.005 | -1.274535            | -.2237439 |
| tobinsq               | .0429613  | .0145362  | 2.96   | 0.003 | .0144709             | .0714517  |
| indepnum              | -1.865823 | .1781667  | -10.47 | 0.000 | -2.215024            | -1.516623 |
| synnum                | .04891    | .0100091  | 4.89   | 0.000 | .0292925             | .0685274  |
| grants                | .0002795  | .0002404  | 1.16   | 0.245 | -.0001917            | .0007507  |
| stage                 | .0563177  | .0116397  | 4.84   | 0.000 | .0335043             | .0791311  |
| ownnum                | .0035381  | .0000946  | 37.39  | 0.000 | .0033526             | .0037235  |
| mancost               | .0045099  | .0001281  | 35.20  | 0.000 | .0042588             | .004761   |
| provincefixedeffects  |           |           |        |       |                      |           |
| 2                     | .2845117  | .02132    | 13.34  | 0.000 | .2427252             | .3262981  |
| 3                     | .2416203  | .0256377  | 9.42   | 0.000 | .1913712             | .2918693  |
| 4                     | .3073637  | .0214037  | 14.36  | 0.000 | .2654133             | .3493141  |
| industryfixedeffects1 |           |           |        |       |                      |           |
| B                     | -1.520087 | .0712674  | -21.33 | 0.000 | -1.659769            | -1.380406 |
| C                     | -1.352654 | .0396994  | -34.07 | 0.000 | -1.430463            | -1.274844 |
| D                     | .1160115  | .0600583  | 1.93   | 0.053 | -.0017005            | .2337235  |
| E                     | -2.001005 | .0835654  | -23.95 | 0.000 | -2.16479             | -1.83722  |
| F                     | -1.854258 | .129948   | -14.27 | 0.000 | -2.108951            | -1.599564 |
| I                     | -1.099378 | .0433247  | -25.38 | 0.000 | -1.184293            | -1.014464 |
| L                     | -1.527837 | .0769211  | -19.86 | 0.000 | -1.6786              | -1.377075 |
| M                     | -1.387629 | .0678485  | -20.45 | 0.000 | -1.520609            | -1.254648 |
| N                     | -.6439009 | .0680652  | -9.46  | 0.000 | -.7773062            | -.5104956 |
| R                     | -3.105174 | .1245743  | -24.93 | 0.000 | -3.349335            | -2.861013 |
| listdt                |           |           |        |       |                      |           |
| 2006                  | 1.372943  | .2806924  | 4.89   | 0.000 | .822796              | 1.92309   |
| 2007                  | 1.988969  | .2632416  | 7.56   | 0.000 | 1.473025             | 2.504914  |
| 2009                  | 1.311095  | .2638075  | 4.97   | 0.000 | .7940415             | 1.828148  |
| 2010                  | 1.302435  | .2614971  | 4.98   | 0.000 | .7899097             | 1.81496   |
| 2011                  | 1.734008  | .260848   | 6.65   | 0.000 | 1.222756             | 2.245261  |
| 2012                  | 1.762831  | .260715   | 6.76   | 0.000 | 1.251839             | 2.273823  |
| 2014                  | 1.756521  | .2619408  | 6.71   | 0.000 | 1.243126             | 2.269915  |
| 2015                  | 1.238258  | .262155   | 4.72   | 0.000 | .724444              | 1.752073  |
| 2016                  | 1.31243   | .2616497  | 5.02   | 0.000 | .7996064             | 1.825254  |
| 2017                  | 1.476587  | .2609131  | 5.66   | 0.000 | .9652068             | 1.987967  |
| _cons                 | -.9402608 | .4036305  | -2.33  | 0.020 | -1.731362            | -.1491595 |

57 .  
58 . log close  
    name: <unnamed>  
    log: C:\Users\Administrator\Desktop\complexity.smcl  
    log type: smcl  
    closed on: 17 Mar 2022, 14:06:19

---
